# Supplementary material
Source: PubMed Central journal article supplement (PMC9892355)

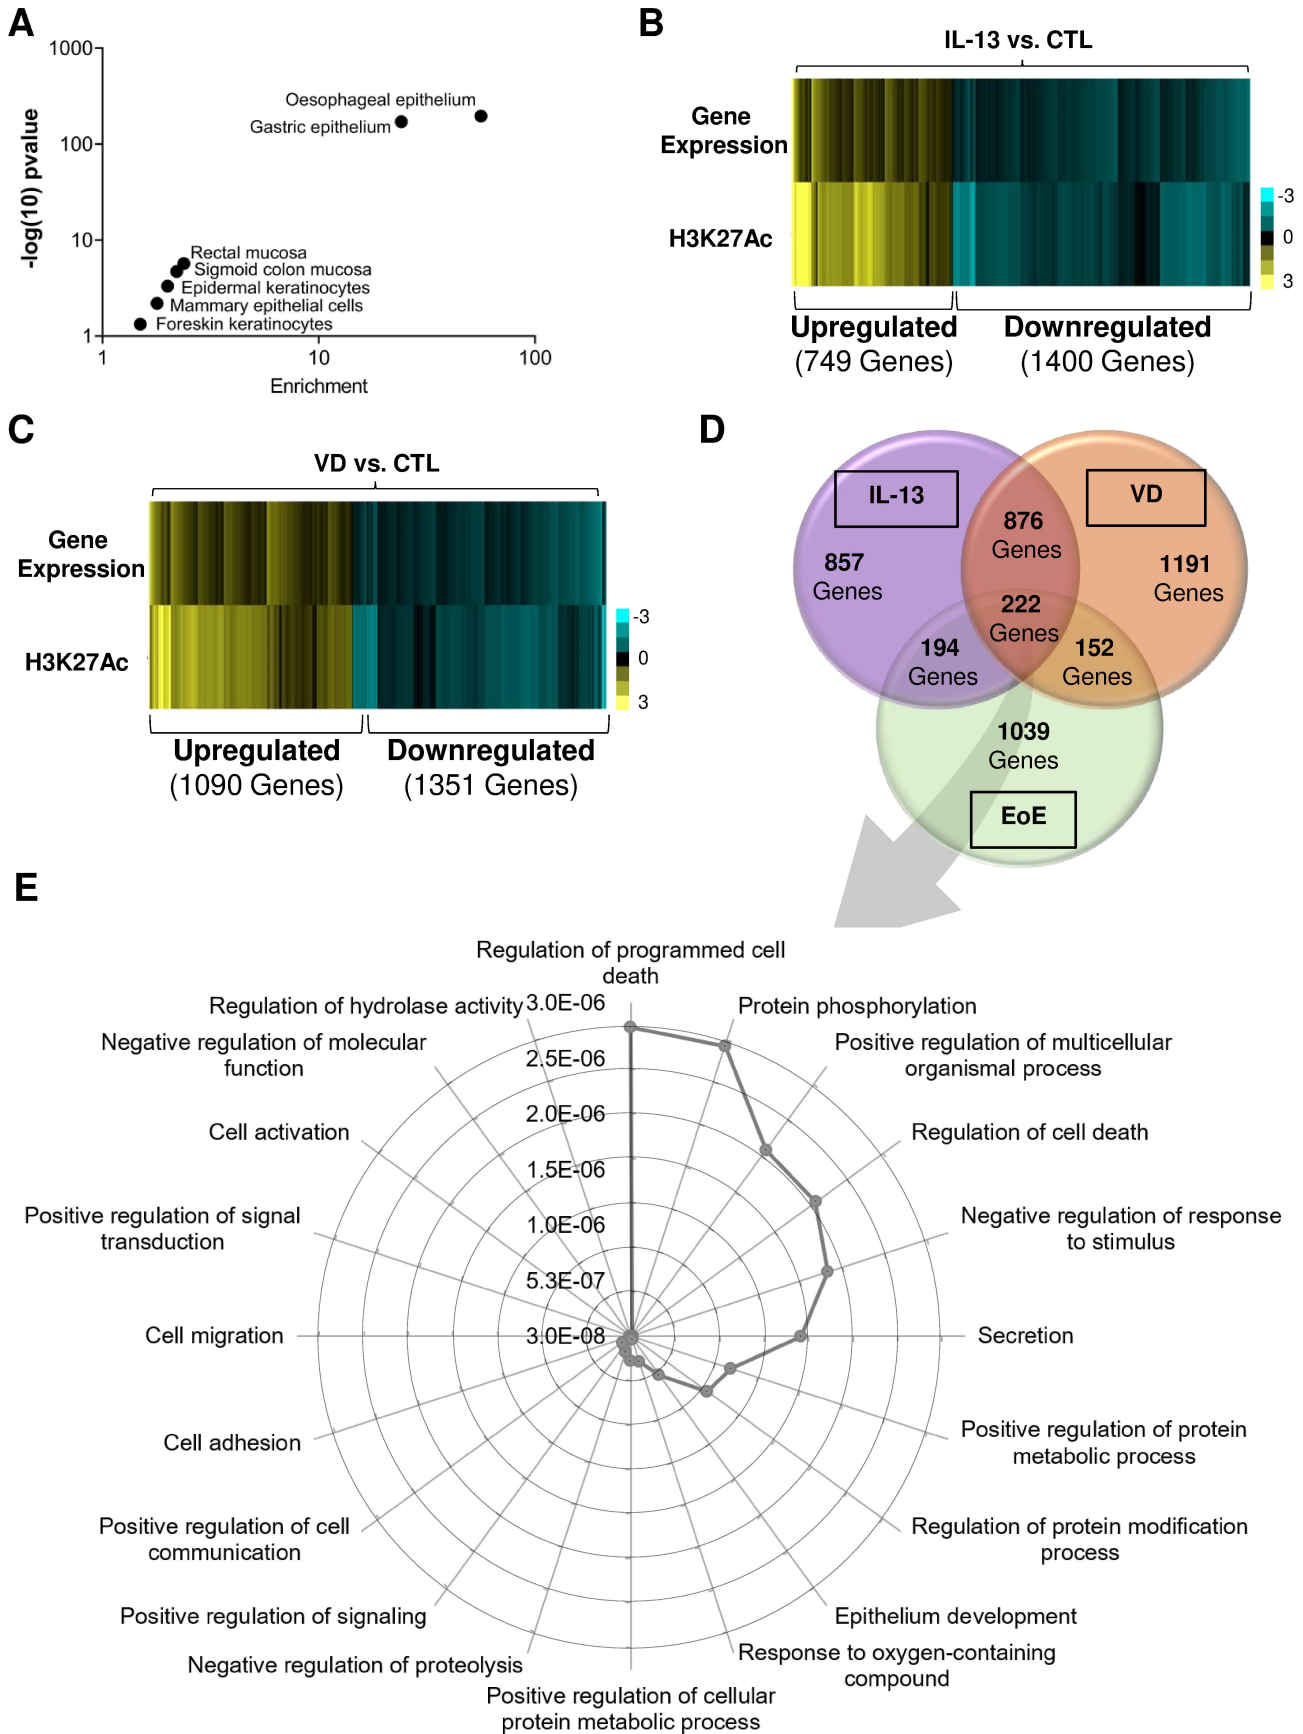

Supplement: NIHMS1840881-supplement-Figure_S1.pdf [file NIHMS1840881-supplement-Figure_S1.pdf]

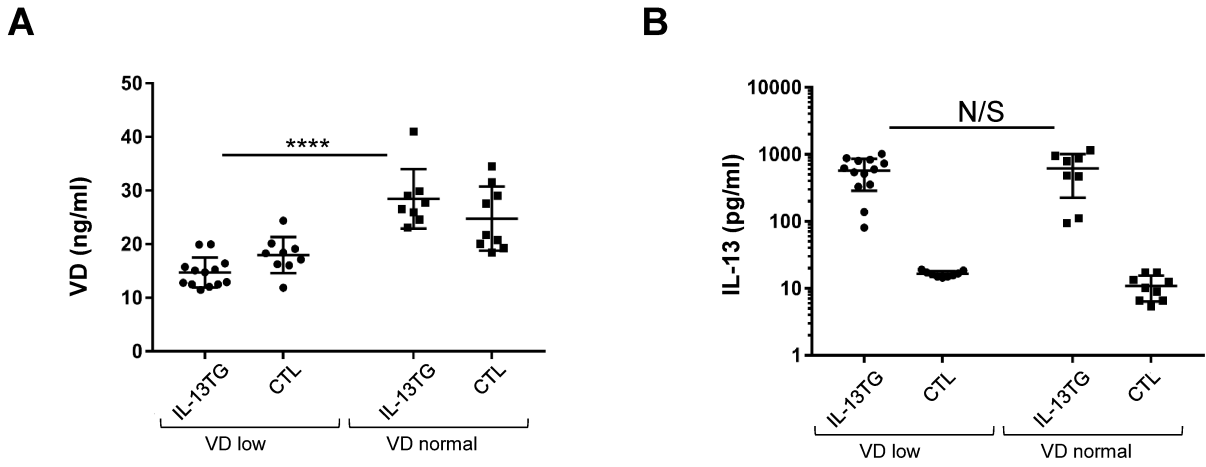

Supplement: NIHMS1840881-supplement-Figure_S2.pdf [file NIHMS1840881-supplement-Figure_S2.pdf]

**A**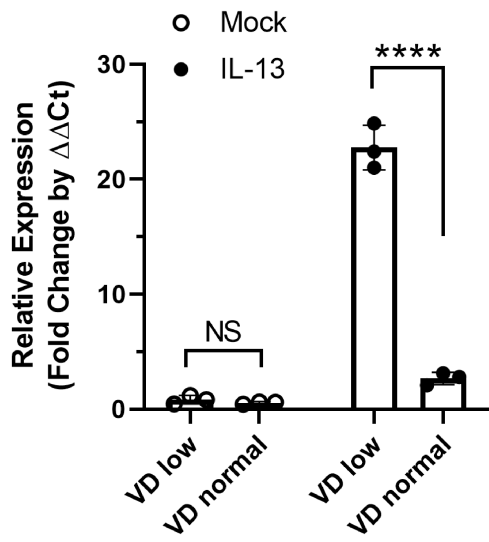

Supplement: NIHMS1840881-supplement-Figure_S3.pdf [file NIHMS1840881-supplement-Figure_S3.pdf]
